# Supplementary material for: Sex-specific associations of adiposity with cardiometabolic traits in the UK: A multi–life stage cohort study with repeat metabolomics
Source: PLoS Med. 2022 Jan 6;19(1):e1003636. doi: 10.1371/journal.pmed.1003636 (PMC8735621; doi:10.1371/journal.pmed.1003636)
Supplement: S12 Table — G0, parent generation 0; G1, offspring generation 1; HDL, high-density lipoprotein; LCI, lower 95% confidence interval; LDL, low-density lipoprotein; UCI, upper 95% confidence interval; VLDL, very-low-density lipoprotein; WC, waist circumference. (XLSX) [file pmed.1003636.s015.xlsx]

## Sheet: S12 Table
S12 Unadjusted sex-specific associations of waist circumference with concentrations of 148 cardiometabolic traits at multiple life stages
	G1: WC at age 9 and metabolic trait at age 15										G1: WC at age 15 and metabolic trait at age 18										G0: WC at age 50 and metabolic trait at age 50
Legend: G1, offspring generation 1; G0, parent generation 0; HDL, high-density lipoprotein; LCI, lower 95% confidence interval; LDL, low-density lipoprotein; UCI, upper 95% confidence interval ; VLDL, very-low-density lipoprotein; WC, waist circumference.
	Female					Male					Female					Male					Female					Male
Standardised outcome	Beta	LCI	UCI	P-value		Beta	LCI	UCI	P-value		Beta	LCI	UCI	P-value		Beta	LCI	UCI	P-value		Beta	LCI	UCI	P-value		Beta	LCI	UCI	P-value
Concentration of chylomicrons and extremely large VLDL particles (mol/l)	0.0746277	0.0112925	0.137963	0.0209421		0.201496	0.120637	0.282355	1.099e-06		0.145481	0.0812979	0.209663	9.354e-06		0.250734	0.15053	0.350939	1.014e-06		0.3783	0.341313	0.415288	8.923e-86		0.377224	0.29425	0.460198	7.06e-19
Total lipids in chylomicrons and extremely large VLDL (mmol/l)	0.0669748	0.0043396	0.12961	0.0361153		0.195732	0.115068	0.276396	2.078e-06		0.148285	0.0830525	0.213518	8.821e-06		0.246165	0.146455	0.345875	1.407e-06		0.390168	0.352702	0.427634	1.001e-88		0.379445	0.295734	0.463155	8.916e-19
Phospholipids in chylomicrons and extremely large VLDL (mmol/l)	0.0642469	0.0022185	0.126275	0.0423567		0.190636	0.110622	0.270651	3.16e-06		0.142768	0.0772249	0.20831	2.047e-05		0.244794	0.145955	0.343634	1.303e-06		0.380119	0.342795	0.417443	4.3e-85		0.394148	0.306756	0.481541	1.321e-18
Total cholesterol in chylomicrons and extremely large VLDL (mmol/l)	0.0732907	0.0072008	0.139381	0.0297584		0.193012	0.113209	0.272816	2.242e-06		0.151748	0.0840814	0.219414	1.161e-05		0.236234	0.13787	0.334599	2.683e-06		0.396815	0.359169	0.43446	9.254e-91		0.364152	0.277884	0.450421	1.663e-16
Cholesterol esters in chylomicrons and extremely large VLDL (mmol/l)	0.0796528	0.0108475	0.148458	0.0232912		0.185744	0.10779	0.263698	3.154e-06		0.155149	0.0858477	0.224449	1.201e-05		0.224382	0.128003	0.320761	5.34e-06		0.393064	0.355527	0.4306	1.2e-89		0.328452	0.241929	0.414975	1.177e-13
Free cholesterol in chylomicrons and extremely large VLDL (mmol/l)	0.0626233	0.000355	0.124892	0.0487093		0.191852	0.111687	0.272016	2.855e-06		0.142655	0.0768417	0.208468	2.246e-05		0.242459	0.142864	0.342055	1.961e-06		0.388031	0.350114	0.425947	7.156e-86		0.394017	0.308625	0.479409	2.149e-19
Triglycerides in chylomicrons and extremely large VLDL (mmol/l)	0.0655645	0.0036295	0.127499	0.0380132		0.195818	0.11503	0.276605	2.131e-06		0.147634	0.0830124	0.212255	7.954e-06		0.247369	0.147424	0.347315	1.324e-06		0.388302	0.35084	0.425764	6e-88		0.378956	0.296734	0.461179	2.36e-19
Concentration of very large VLDL particles (mol/l)	0.0679722	0.0056881	0.130256	0.0324537		0.204187	0.122634	0.285741	9.784e-07		0.146478	0.0808089	0.212146	1.292e-05		0.254065	0.151569	0.35656	1.276e-06		0.373421	0.33754	0.409302	1.261e-88		0.386791	0.304924	0.468658	2.999e-20
Total lipids in very large VLDL (mmol/l)	0.0652584	0.0027453	0.127772	0.0407605		0.200633	0.11952	0.281745	1.317e-06		0.148012	0.081361	0.214663	1.41e-05		0.251831	0.150123	0.353538	1.311e-06		0.39001	0.353614	0.426405	1.299e-93		0.382751	0.301008	0.464495	6.406e-20
Phospholipids in very large VLDL (mmol/l)	0.0625842	-0.000509	0.125677	0.0518754		0.196392	0.115354	0.277429	2.139e-06		0.140248	0.073463	0.207033	3.999e-05		0.246581	0.144686	0.348475	2.253e-06		0.383891	0.347069	0.420714	6.443e-89		0.373302	0.289634	0.45697	3.03e-18
Total cholesterol in very large VLDL (mmol/l)	0.0753267	0.0100122	0.140641	0.023816		0.205344	0.125026	0.285663	5.77e-07		0.154003	0.0873547	0.220651	6.269e-06		0.249263	0.149715	0.34881	9.971e-07		0.401159	0.363749	0.43857	9.906e-94		0.359795	0.276207	0.443382	4.255e-17
Cholesterol esters in very large VLDL (mmol/l)	0.081778	0.0157813	0.147775	0.0151797		0.211294	0.131085	0.291503	2.609e-07		0.161651	0.0950828	0.228218	2.079e-06		0.252616	0.153338	0.351894	6.665e-07		0.395905	0.359129	0.432682	2.022e-94		0.360533	0.277406	0.443659	2.473e-17
Free cholesterol in very large VLDL (mmol/l)	0.067478	0.0031132	0.131843	0.0399105		0.196072	0.115925	0.276218	1.715e-06		0.144399	0.077731	0.211067	2.277e-05		0.244204	0.144633	0.343775	1.647e-06		0.403694	0.365596	0.441793	1.159e-91		0.355847	0.272231	0.439462	9.461e-17
Triglycerides in very large VLDL (mmol/l)	0.0624874	0.0009523	0.124022	0.0465612		0.198936	0.117731	0.28014	1.659e-06		0.147008	0.0802367	0.21378	1.668e-05		0.252203	0.150158	0.354247	1.37e-06		0.385562	0.349586	0.421538	1.24e-93		0.389703	0.309284	0.470123	3.283e-21
Concentration of large VLDL particles (mol/l)	0.0677206	0.0052704	0.130171	0.0335693		0.197857	0.117535	0.27818	1.456e-06		0.156927	0.0874729	0.226381	9.983e-06		0.256782	0.157252	0.356312	4.667e-07		0.403487	0.369018	0.437955	1.18e-110		0.437766	0.36415	0.511383	5.465e-31
Total lipids in large VLDL (mmol/l)	0.0665555	0.0035299	0.129581	0.0384867		0.1974	0.117247	0.277552	1.462e-06		0.15757	0.0880807	0.227059	9.281e-06		0.254778	0.155225	0.354331	5.752e-07		0.410444	0.375211	0.445677	1.16e-109		0.432732	0.359551	0.505913	1.151e-30
Phospholipids in large VLDL (mmol/l)	0.0650602	0.0017814	0.128339	0.0438953		0.195385	0.115251	0.27552	1.856e-06		0.153505	0.083894	0.223116	1.617e-05		0.252915	0.153722	0.352109	6.327e-07		0.409696	0.374402	0.444991	6.16e-109		0.428055	0.354787	0.501322	5.526e-30
Total cholesterol in large VLDL (mmol/l)	0.0685984	0.0034099	0.133787	0.0391708		0.196122	0.11646	0.275783	1.475e-06		0.158384	0.0886335	0.228134	9.017e-06		0.249643	0.150953	0.348332	7.737e-07		0.415741	0.379823	0.45166	2.39e-108		0.425291	0.349717	0.500865	5.781e-28
Cholesterol esters in large VLDL (mmol/l)	0.0731658	0.0063196	0.140012	0.0319472		0.194115	0.115652	0.272579	1.311e-06		0.166445	0.0962887	0.236602	3.533e-06		0.245067	0.148464	0.34167	7.197e-07		0.419103	0.383408	0.454797	2.79e-111		0.411717	0.337996	0.485438	1.427e-27
Free cholesterol in large VLDL (mmol/l)	0.0633362	-6.11e-05	0.126734	0.0502211		0.195371	0.11487	0.275872	2.069e-06		0.148941	0.0796004	0.218281	2.659e-05		0.251677	0.151225	0.352128	9.825e-07		0.408344	0.372112	0.444576	4.36e-103		0.43469	0.357608	0.511772	4.494e-28
Triglycerides in large VLDL (mmol/l)	0.065921	0.003788	0.128054	0.037586		0.197488	0.117301	0.277674	1.462e-06		0.157472	0.0881367	0.226807	8.982e-06		0.255734	0.156097	0.355372	5.338e-07		0.407105	0.372127	0.442084	1.79e-109		0.435442	0.363308	0.507576	7.183e-32
Concentration of medium VLDL particles (mol/l)	0.0754945	0.0105556	0.140433	0.0227148		0.201205	0.122532	0.279878	5.72e-07		0.165896	0.0953698	0.236422	4.269e-06		0.259366	0.163259	0.355472	1.367e-07		0.420594	0.38653	0.454658	2.42e-122		0.470162	0.400921	0.539403	9.648e-40
Total lipids in medium VLDL (mmol/l)	0.0752272	0.0094938	0.140961	0.0249139		0.199313	0.120839	0.277786	6.828e-07		0.167946	0.0972041	0.238688	3.481e-06		0.25633	0.160805	0.351855	1.607e-07		0.433279	0.398003	0.468556	3.75e-121		0.464058	0.395164	0.532953	3.812e-39
Phospholipids in medium VLDL (mmol/l)	0.0669919	0.0009711	0.133013	0.0467268		0.187201	0.10865	0.265753	3.141e-06		0.158698	0.0872759	0.230121	1.395e-05		0.250791	0.156467	0.345114	2.077e-07		0.436358	0.401041	0.471675	1.69e-122		0.458129	0.389537	0.526721	1.58e-38
Total cholesterol in medium VLDL (mmol/l)	0.0661808	-0.0024455	0.134807	0.058734		0.174712	0.0975458	0.251877	9.443e-06		0.159817	0.0877979	0.231836	1.431e-05		0.234087	0.142824	0.325349	5.429e-07		0.43464	0.397671	0.471609	1.14e-111		0.421575	0.352368	0.490782	2.013e-32
Cholesterol esters in medium VLDL (mmol/l)	0.0672536	-0.0029273	0.137434	0.0603429		0.163821	0.0898275	0.237814	1.478e-05		0.159573	0.0867649	0.232382	1.82e-05		0.214998	0.127577	0.30242	1.542e-06		0.422859	0.384731	0.460986	3.97e-100		0.369937	0.302181	0.437693	1.917e-26
Free cholesterol in medium VLDL (mmol/l)	0.0607618	-0.004977	0.126501	0.0700336		0.177854	0.099009	0.2567	1.018e-05		0.151875	0.0803861	0.223363	3.251e-05		0.245241	0.150912	0.33957	3.812e-07		0.431501	0.395606	0.467397	2.14e-116		0.46242	0.392407	0.532433	9.971e-38
Triglycerides in medium VLDL (mmol/l)	0.0801111	0.0161845	0.144038	0.0140665		0.208798	0.130766	0.286831	1.692e-07		0.170165	0.0999256	0.240405	2.196e-06		0.26179	0.165183	0.358396	1.216e-07		0.424215	0.389626	0.458803	7.88e-121		0.477524	0.40927	0.545778	4.862e-42
Concentration of small VLDL particles (mol/l)	0.074764	0.0065037	0.143024	0.0318318		0.161512	0.086176	0.236847	2.725e-05		0.144175	0.0692836	0.219067	0.00016519		0.238711	0.155962	0.321461	1.809e-08		0.474616	0.438551	0.510681	1.04e-137		0.420455	0.357794	0.483116	7.281e-39
Total lipids in small VLDL (mmol/l)	0.0804918	0.0112841	0.1497	0.0226566		0.158321	0.0842164	0.232425	2.904e-05		0.145029	0.0691318	0.220926	0.00018456		0.235228	0.155616	0.314841	8.196e-09		0.497447	0.459873	0.535022	3.08e-139		0.395698	0.335456	0.45594	2.438e-37
Phospholipids in small VLDL (mmol/l)	0.086756	0.0167898	0.156722	0.0151104		0.148507	0.0760579	0.220955	6.022e-05		0.13431	0.0554167	0.213203	0.00085946		0.229122	0.155273	0.302971	1.451e-09		0.503039	0.465454	0.540624	4.54e-142		0.381249	0.323582	0.438916	8.504e-38
Total cholesterol in small VLDL (mmol/l)	0.0846775	0.014137	0.155218	0.0186575		0.13335	0.0646087	0.202092	0.00014617		0.133905	0.0551224	0.212688	0.00087619		0.197973	0.124868	0.271079	1.239e-07		0.454083	0.417625	0.49054	2.42e-124		0.2663	0.211422	0.321178	2.822e-21
Cholesterol esters in small VLDL (mmol/l)	0.0890616	0.0185533	0.15957	0.0133216		0.12966	0.0638527	0.195468	0.00011487		0.132334	0.052773	0.211895	0.00112772		0.177771	0.105639	0.249904	1.467e-06		0.407062	0.372022	0.442101	3.34e-109		0.19865	0.145331	0.25197	3.246e-13
Free cholesterol in small VLDL (mmol/l)	0.0678023	-0.0021975	0.137802	0.0576321		0.128066	0.055087	0.201044	0.00058975		0.122589	0.0442959	0.200883	0.00216818		0.215139	0.139426	0.290852	2.927e-08		0.485662	0.447317	0.524007	2.85e-128		0.355348	0.298428	0.412268	6.022e-34
Triglycerides in small VLDL (mmol/l)	0.0635713	-0.0023727	0.129515	0.0588246		0.162735	0.086011	0.239459	3.313e-05		0.140041	0.0667738	0.213309	0.00018383		0.239338	0.151521	0.327155	1.031e-07		0.455283	0.419175	0.49139	3.27e-127		0.441261	0.379592	0.502929	7.419e-44
Concentration of very small VLDL particles (mol/l)	0.017822	-0.0494882	0.0851321	0.60365		0.0173929	-0.0476451	0.082431	0.600027		0.0552973	-0.0248837	0.135478	0.176335		0.115882	0.0495836	0.18218	0.0006226		0.378988	0.341787	0.416189	2.264e-85		0.207154	0.14252	0.271789	3.604e-10
Total lipids in very small VLDL (mmol/l)	0.0404526	-0.0269338	0.107839	0.23923		0.0501913	-0.0149394	0.115322	0.130873		0.0733034	-0.0084555	0.155062	0.0788375		0.127682	0.0597198	0.195644	0.00023632		0.32506	0.290725	0.359395	2.314e-74		0.144251	0.0917375	0.196764	7.574e-08
Phospholipids in very small VLDL (mmol/l)	-0.0082502	-0.0737179	0.0572176	0.804831		-0.0164911	-0.0783738	0.0453916	0.601305		0.0257	-0.0555931	0.106993	0.535285		0.0764529	0.010017	0.142889	0.0241308		0.279918	0.242179	0.317657	6.289e-47		0.0530588	-0.005071	0.111188	0.0736077
Total cholesterol in very small VLDL (mmol/l)	0.0651461	-0.0012248	0.131517	0.0543764		0.0744494	0.0107764	0.138122	0.0219454		0.0872592	0.0044405	0.170078	0.0389311		0.110958	0.0419361	0.179979	0.00164504		0.214444	0.184539	0.244348	4.89e-44		0.0672297	0.0211803	0.113279	0.00422565
Cholesterol esters in very small VLDL (mmol/l)	0.0875849	0.0194229	0.155747	0.0118111		0.10511	0.0425584	0.167662	0.00099893		0.102531	0.0197353	0.185327	0.0152509		0.127302	0.0576453	0.196958	0.00034765		0.202762	0.174074	0.23145	7.495e-43		0.0736644	0.0289445	0.118384	0.001249
Free cholesterol in very small VLDL (mmol/l)	0.0108912	-0.0508515	0.0726339	0.729434		-0.0006529	-0.065707	0.0644012	0.984298		0.0415274	-0.0395603	0.122615	0.315282		0.0614542	-0.0049075	0.127816	0.0694966		0.232306	0.198738	0.265875	3.476e-41		0.048917	-0.0003105	0.0981446	0.0514619
Triglycerides in very small VLDL (mmol/l)	0.0298572	-0.0389917	0.0987062	0.395177		0.0601031	-0.0108682	0.131075	0.0969083		0.06677	-0.0107126	0.144253	0.0911727		0.165352	0.0932773	0.237427	7.29e-06		0.457096	0.418464	0.495729	5.28e-113		0.34754	0.293121	0.401959	2.016e-35
Concentration of IDL particles (mol/l)	-0.0388116	-0.103031	0.025408	0.236077		-0.0590278	-0.119833	0.0017775	0.0570773		-0.0068568	-0.0883385	0.0746248	0.868918		0.0398451	-0.0254959	0.105186	0.231836		0.200741	0.162584	0.238899	1.093e-24		-0.0061833	-0.0810188	0.0686523	0.871327
Total lipids in IDL (mmol/l)	-0.0233193	-0.0880668	0.0414281	0.480084		-0.0400163	-0.101016	0.0209832	0.198416		0.004653	-0.0772087	0.0865146	0.911244		0.0479461	-0.0183725	0.114265	0.156368		0.188435	0.150703	0.226166	1.983e-22		-0.0211876	-0.0794696	0.0370945	0.47607
Phospholipids in IDL (mmol/l)	-0.0340759	-0.0974218	0.0292699	0.29158		-0.0645197	-0.124487	-0.0045522	0.0349789		-0.0141877	-0.0951816	0.0668063	0.731203		0.0224322	-0.0427808	0.0876453	0.49996		0.166192	0.12757	0.204815	4.284e-17		-0.0652104	-0.124788	-0.005633	0.0319373
Total cholesterol in IDL (mmol/l)	-0.014491	-0.0802845	0.0513025	0.665841		-0.020029	-0.0815563	0.0414983	0.523293		0.0183968	-0.0641351	0.100929	0.662012		0.0550599	-0.0133893	0.123509	0.114816		0.160993	0.123608	0.198378	4.053e-17		-0.0387976	-0.0970281	0.0194329	0.191545
Cholesterol esters in IDL (mmol/l)	-0.0039521	-0.070853	0.0629488	0.907784		0.0040124	-0.0586587	0.0666836	0.900097		0.0352142	-0.0472735	0.117702	0.402522		0.0763076	0.0064211	0.146194	0.0323713		0.183852	0.146699	0.221004	4.696e-22		-0.004291	-0.0628661	0.0542841	0.88581
Free cholesterol in IDL (mmol/l)	-0.0386972	-0.101783	0.0243882	0.229135		-0.0766156	-0.135941	-0.0172898	0.0113922		-0.0229641	-0.104709	0.0587809	0.581699		0.0027698	-0.0627848	0.0683244	0.933962		0.101287	0.0634179	0.139157	1.642e-07		-0.123435	-0.181346	-0.0655245	2.984e-05
Triglycerides in IDL (mmol/l)	-0.0426418	-0.111718	0.0264342	0.226183		-0.090214	-0.147507	-0.0329208	0.00204126		-0.0335677	-0.111135	0.044	0.396106		0.0441503	-0.012408	0.100709	0.125933		0.33457	0.295476	0.373664	1.819e-61		0.195826	0.146414	0.245239	9.54e-15
Concentration of large LDL particles (mol/l)	-0.0243724	-0.0880319	0.0392872	0.452856		-0.0561139	-0.117626	0.005398	0.0737601		-0.003957	-0.0845646	0.0766506	0.923304		0.0458224	-0.019422	0.111067	0.168531		0.2034	0.16508	0.24172	4.254e-25		-0.0234812	-0.0978858	0.0509235	0.536147
Total lipids in large LDL (mmol/l)	-0.0219879	-0.0861079	0.042132	0.501349		-0.0484377	-0.109953	0.0130773	0.122696		-0.0002542	-0.0811959	0.0806875	0.995086		0.0495572	-0.015997	0.115112	0.138324		0.217308	0.17728	0.257336	3.627e-26		-0.0299259	-0.0914308	0.031579	0.340192
Phospholipids in large LDL (mmol/l)	-0.0116985	-0.0763204	0.0529234	0.722617		-0.0313309	-0.0932013	0.0305395	0.320787		0.0128294	-0.0681652	0.0938239	0.756077		0.0625252	-0.0042527	0.129303	0.066464		0.225943	0.186229	0.265657	1.52e-28		-0.0312351	-0.0929251	0.030455	0.320944
Total cholesterol in large LDL (mmol/l)	-0.0189471	-0.0833358	0.0454416	0.563958		-0.0426319	-0.104377	0.0191134	0.175876		0.0043003	-0.0769968	0.0855973	0.917379		0.0482432	-0.0185925	0.115079	0.157026		0.203759	0.163377	0.244141	7.389e-23		-0.0432271	-0.105489	0.0190345	0.173543
Cholesterol esters in large LDL (mmol/l)	-0.015498	-0.0802378	0.0492417	0.638791		-0.0341108	-0.096514	0.0282925	0.283863		0.0113081	-0.0698959	0.0925121	0.784779		0.0579011	-0.0094499	0.125252	0.0919442		0.224673	0.184008	0.265338	4.946e-27		-0.0196079	-0.0820805	0.0428646	0.538374
Free cholesterol in large LDL (mmol/l)	-0.0292719	-0.0925901	0.0340463	0.364723		-0.0687643	-0.12893	-0.0085987	0.0251056		-0.0172914	-0.0987584	0.0641756	0.677233		0.0182604	-0.0476057	0.0841266	0.586666		0.136153	0.096935	0.175372	1.124e-11		-0.115604	-0.177185	-0.0540218	0.00023554
Triglycerides in large LDL (mmol/l)	-0.0608038	-0.129168	0.00756	0.0812669		-0.114807	-0.170566	-0.0590483	5.582e-05		-0.0581955	-0.136355	0.0199643	0.144366		0.0196323	-0.034274	0.0735386	0.475117		0.243942	0.205025	0.28286	3.33e-34		0.094786	0.0471705	0.142401	9.646e-05
Concentration of medium LDL particles (mol/l)	-0.0123814	-0.0759866	0.0512237	0.702691		-0.041443	-0.104226	0.0213401	0.195635		0.0059899	-0.0742949	0.0862748	0.883671		0.0643689	-0.0016937	0.130431	0.0561623		0.237269	0.199683	0.274857	1.17e-34		0.0144481	-0.0555026	0.0843988	0.68555
Total lipids in medium LDL (mmol/l)	-0.0138834	-0.0781161	0.0503492	0.671705		-0.0385789	-0.10066	0.0235027	0.223112		0.0067867	-0.0742632	0.0878367	0.869561		0.0625943	-0.0035633	0.128752	0.0636654		0.250356	0.209424	0.291288	1.136e-32		0.0068143	-0.0519267	0.0655552	0.820105
Phospholipids in medium LDL (mmol/l)	0.0011072	-0.0641934	0.0664078	0.973478		-0.0042131	-0.0700819	0.0616557	0.900193		0.028802	-0.051778	0.109382	0.48335		0.102111	0.0342679	0.169955	0.00320139		0.299347	0.258693	0.340002	2.759e-46		0.0728228	0.013442	0.132204	0.0162433
Total cholesterol in medium LDL (mmol/l)	-0.012449	-0.0767873	0.0518893	0.704391		-0.0355744	-0.0970799	0.025931	0.25681		0.0092506	-0.0722584	0.0907595	0.823869		0.0557841	-0.0115449	0.123113	0.104334		0.231315	0.190333	0.272298	3.985e-28		-0.0173377	-0.0769857	0.0423103	0.568813
Cholesterol esters in medium LDL (mmol/l)	-0.0115913	-0.0758416	0.052659	0.723531		-0.0329519	-0.0940439	0.0281401	0.290284		0.0111007	-0.070211	0.0924124	0.788905		0.0549662	-0.012389	0.122321	0.109648		0.236651	0.19552	0.277782	3.789e-29		-0.0165053	-0.0758455	0.0428349	0.585576
Free cholesterol in medium LDL (mmol/l)	-0.0156658	-0.080066	0.0487344	0.633382		-0.0455536	-0.109412	0.0183047	0.161978		0.0011423	-0.0806224	0.082907	0.978142		0.0581236	-0.0092014	0.125449	0.090579		0.200721	0.161193	0.240248	3.975e-23		-0.020309	-0.0796227	0.0390048	0.50209
Triglycerides in medium LDL (mmol/l)	-0.0516167	-0.118214	0.0149808	0.128675		-0.12284	-0.179966	-0.0657136	2.578e-05		-0.0593457	-0.136904	0.0182124	0.13359		0.0108054	-0.0425707	0.0641816	0.691366		0.210129	0.169322	0.250937	9.936e-24		0.0683704	0.0252481	0.111493	0.00189255
Concentration of small LDL particles (mol/l)	-0.015197	-0.0790824	0.0486884	0.640909		-0.0428078	-0.107536	0.0219204	0.19479		0.0026179	-0.0783128	0.0835486	0.949417		0.070429	0.0043701	0.136488	0.0366669		0.214651	0.177254	0.252049	5.112e-29		0.0116299	-0.0623218	0.0855817	0.757861
Total lipids in small LDL (mmol/l)	-0.011704	-0.0760589	0.052651	0.72139		-0.0356569	-0.0991436	0.0278297	0.270838		0.0095358	-0.0718082	0.0908798	0.81817		0.0676339	0.0009045	0.134363	0.0469781		0.238455	0.197583	0.279327	6.494e-30		6.61e-05	-0.0589673	0.0590995	0.998248
Phospholipids in small LDL (mmol/l)	-0.0147533	-0.0799488	0.0504422	0.657251		-0.0215479	-0.0884653	0.0453695	0.527797		0.0195404	-0.0618642	0.100945	0.637828		0.0936353	0.0260991	0.161171	0.00660997		0.25094	0.210553	0.291328	1.203e-33		0.0427589	-0.0186114	0.104129	0.172028
Total cholesterol in small LDL (mmol/l)	-0.0100193	-0.0741986	0.0541601	0.759522		-0.0369858	-0.0992733	0.0253017	0.244367		0.0074333	-0.074223	0.0890896	0.85831		0.0531694	-0.0144159	0.120755	0.123011		0.212555	0.171685	0.253425	3.609e-24		-0.0346333	-0.0940908	0.0248241	0.253535
Cholesterol esters in small LDL (mmol/l)	-0.0111568	-0.0748044	0.0524907	0.731064		-0.0378399	-0.0994264	0.0237467	0.228371		0.0065455	-0.0744348	0.0875258	0.87405		0.049535	-0.0179075	0.116978	0.149882		0.216656	0.175492	0.25782	1.042e-24		-0.036156	-0.094896	0.022584	0.227603
Free cholesterol in small LDL (mmol/l)	-0.0043461	-0.0692262	0.060534	0.895499		-0.0309622	-0.0971126	0.0351882	0.358781		0.0108131	-0.0717768	0.093403	0.797364		0.0680443	-0.0005219	0.136611	0.0517674		0.179041	0.141113	0.21697	3.151e-20		-0.0254376	-0.0843749	0.0334996	0.397516
Triglycerides in small LDL (mmol/l)	-0.0139943	-0.079868	0.0518794	0.677006		-0.0397682	-0.104076	0.0245393	0.225365		-0.0007513	-0.0789799	0.0774773	0.984973		0.0917943	0.0293967	0.154192	0.00396005		0.328191	0.287653	0.368729	2.366e-55		0.1972	0.146485	0.247915	2.96e-14
Concentration of very large HDL particles (mol/l)	-0.165915	-0.229129	-0.102701	2.882e-07		-0.23865	-0.292236	-0.185065	4.798e-18		-0.157925	-0.236433	-0.0794174	8.305e-05		-0.198849	-0.254721	-0.142977	4.29e-12		-0.494196	-0.526191	-0.462201	1.43e-184		-0.326339	-0.36783	-0.284847	2.119e-52
Total lipids in very large HDL (mmol/l)	-0.165076	-0.229023	-0.10113	4.487e-07		-0.236809	-0.291341	-0.182277	3.023e-17		-0.153884	-0.233028	-0.0747399	0.00014208		-0.195268	-0.252473	-0.138062	2.972e-11		-0.46694	-0.498068	-0.435811	5.41e-175		-0.265371	-0.299254	-0.231488	5.517e-52
Phospholipids in very large HDL (mmol/l)	-0.168435	-0.23121	-0.10566	1.566e-07		-0.242809	-0.296148	-0.18947	9.048e-19		-0.166672	-0.24423	-0.0891145	2.636e-05		-0.213259	-0.268803	-0.157715	8.388e-14		-0.501211	-0.532486	-0.469936	2.67e-197		-0.328246	-0.366131	-0.290361	6.792e-63
Total cholesterol in very large HDL (mmol/l)	-0.148616	-0.214108	-0.0831238	9.016e-06		-0.220094	-0.276857	-0.163331	4.242e-14		-0.128596	-0.20808	-0.0491111	0.00153551		-0.163496	-0.226111	-0.100881	3.397e-07		-0.421792	-0.453066	-0.390518	5.47e-144		-0.204664	-0.235504	-0.173824	4.653e-38
Cholesterol esters in very large HDL (mmol/l)	-0.138635	-0.204719	-0.0725507	4.033e-05		-0.211588	-0.268987	-0.15419	6.694e-13		-0.11545	-0.194596	-0.0363041	0.00427587		-0.149397	-0.214735	-0.0840586	7.816e-06		-0.402467	-0.433807	-0.371126	1.63e-131		-0.187411	-0.216959	-0.157863	5.814e-35
Free cholesterol in very large HDL (mmol/l)	-0.167074	-0.23076	-0.103388	2.919e-07		-0.231849	-0.286894	-0.176804	2.494e-16		-0.155805	-0.235606	-0.0760041	0.00013333		-0.189538	-0.246595	-0.132482	9.666e-11		-0.467955	-0.499237	-0.436673	4.03e-174		-0.249109	-0.284136	-0.214082	2.394e-43
Triglycerides in very large HDL (mmol/l)	-0.142319	-0.202387	-0.0822517	3.58e-06		-0.0978262	-0.160283	-0.0353697	0.0021553		-0.036835	-0.111033	0.037363	0.33033		-0.0222118	-0.103807	0.0593839	0.593456		-0.142669	-0.180817	-0.10452	2.65e-13		0.0826559	0.0231913	0.142121	0.00645266
Concentration of large HDL particles (mol/l)	-0.156717	-0.220612	-0.0928218	1.613e-06		-0.231464	-0.285135	-0.177794	4.925e-17		-0.161372	-0.23792	-0.0848238	3.735e-05		-0.198276	-0.255251	-0.141301	1.237e-11		-0.480053	-0.510484	-0.449622	8.29e-192		-0.438575	-0.4878	-0.38935	2.663e-66
Total lipids in large HDL (mmol/l)	-0.161064	-0.224695	-0.0974335	7.444e-07		-0.231369	-0.285165	-0.177573	5.969e-17		-0.162846	-0.239321	-0.0863696	3.118e-05		-0.200792	-0.258661	-0.142923	1.417e-11		-0.47992	-0.509607	-0.450233	1.76e-200		-0.34051	-0.378499	-0.302521	4.676e-67
Phospholipids in large HDL (mmol/l)	-0.148968	-0.212287	-0.0856482	4.186e-06		-0.219817	-0.27337	-0.166265	1.35e-15		-0.151419	-0.227427	-0.0754118	9.714e-05		-0.181159	-0.23845	-0.123868	7.075e-10		-0.442217	-0.471854	-0.412581	2.33e-173		-0.343056	-0.382956	-0.303155	5.429e-62
Total cholesterol in large HDL (mmol/l)	-0.168352	-0.232579	-0.104124	2.987e-07		-0.239441	-0.294077	-0.184804	1.57e-17		-0.173185	-0.250194	-0.0961765	1.097e-05		-0.217585	-0.276499	-0.158671	6.745e-13		-0.508788	-0.538706	-0.47887	1.37e-219		-0.344872	-0.382149	-0.307594	3.517e-71
Cholesterol esters in large HDL (mmol/l)	-0.16944	-0.233802	-0.105078	2.654e-07		-0.240427	-0.29497	-0.185884	1.027e-17		-0.173796	-0.250913	-0.0966796	1.051e-05		-0.218666	-0.277649	-0.159682	5.545e-13		-0.508042	-0.538047	-0.478036	7.27e-218		-0.341279	-0.378259	-0.3043	7.47e-71
Free cholesterol in large HDL (mmol/l)	-0.163648	-0.227451	-0.099845	5.308e-07		-0.235153	-0.28987	-0.180437	6.287e-17		-0.170023	-0.246752	-0.0932939	1.472e-05		-0.212643	-0.271453	-0.153834	1.976e-12		-0.510569	-0.540239	-0.480899	2.83e-224		-0.355787	-0.394074	-0.3175	8.91e-72
Triglycerides in large HDL (mmol/l)	-0.117449	-0.180136	-0.0547625	0.00024433		-0.0782261	-0.133054	-0.0233979	0.00518828		-0.0159499	-0.0907229	0.0588232	0.675712		-0.0402355	-0.109186	0.0287148	0.25255		-0.376663	-0.409006	-0.344321	1.15e-109		-0.165139	-0.199417	-0.13086	5.403e-21
Concentration of medium HDL particles (mol/l)	-0.0283894	-0.0927834	0.0360047	0.387372		-0.0466751	-0.105214	0.0118643	0.118056		-0.0423819	-0.12812	0.0433559	0.332401		-0.006967	-0.0674578	0.0535238	0.8213		-0.0197669	-0.0542769	0.0147431	0.261525		-0.23987	-0.308024	-0.171716	5.869e-12
Total lipids in medium HDL (mmol/l)	-0.0403352	-0.10401	0.0233392	0.214279		-0.0623587	-0.121186	-0.0035311	0.0377557		-0.0516172	-0.135935	0.0327011	0.230029		-0.0237628	-0.0863034	0.0387778	0.456218		-0.0590214	-0.0928965	-0.0251464	0.00064127		-0.205833	-0.259974	-0.151691	1.073e-13
Phospholipids in medium HDL (mmol/l)	-0.0457448	-0.11074	0.0192501	0.167657		-0.0765133	-0.134169	-0.0188576	0.00931842		-0.0598102	-0.145047	0.0254269	0.168911		-0.027703	-0.0870842	0.0316781	0.360291		-0.0405237	-0.0748038	-0.0062436	0.0205168		-0.172966	-0.226157	-0.119775	1.999e-10
Total cholesterol in medium HDL (mmol/l)	-0.0484128	-0.111354	0.0145289	0.131602		-0.074443	-0.134621	-0.014265	0.0153505		-0.0618633	-0.143223	0.019496	0.136046		-0.0468043	-0.11487	0.0212616	0.177607		-0.138478	-0.170947	-0.10601	7.999e-17		-0.277846	-0.332015	-0.223677	1.47e-23
Cholesterol esters in medium HDL (mmol/l)	-0.0476498	-0.11075	0.0154509	0.138787		-0.075544	-0.136113	-0.0149751	0.0145275		-0.0645018	-0.145835	0.0168314	0.120015		-0.0503641	-0.11895	0.0182217	0.149968		-0.146292	-0.179169	-0.113416	3.645e-18		-0.282815	-0.337074	-0.228555	2.873e-24
Free cholesterol in medium HDL (mmol/l)	-0.0496912	-0.11248	0.0130978	0.120813		-0.0596319	-0.11846	-0.0008035	0.0469546		-0.0463784	-0.126926	0.0341697	0.258909		-0.0272679	-0.0931187	0.0385829	0.416792		-0.106291	-0.1379	-0.0746814	4.788e-11		-0.249673	-0.302358	-0.196989	2.258e-20
Triglycerides in medium HDL (mmol/l)	0.0845736	0.0134716	0.155675	0.0197591		0.155937	0.0889369	0.222936	5.292e-06		0.127991	0.0437728	0.212208	0.00291723		0.183649	0.114374	0.252924	2.253e-07		0.445518	0.408233	0.482804	4.3e-115		0.312307	0.258604	0.366011	9.819e-30
Concentration of small HDL particles (mol/l)	0.0868878	0.0202987	0.153477	0.0105688		0.0997762	0.0384539	0.161099	0.00143901		0.0322465	-0.0596433	0.124136	0.491349		0.109425	0.0459644	0.172886	0.00073668		0.262051	0.233209	0.290893	8.195e-69		0.0823033	0.0265261	0.13808	0.00383531
Total lipids in small HDL (mmol/l)	0.0483175	-0.0194428	0.116078	0.162148		0.021902	-0.0377397	0.0815437	0.47151		-0.0040307	-0.0934978	0.0854364	0.929595		0.0599968	-0.002287	0.122281	0.0590154		0.365283	0.328278	0.402289	1.896e-80		0.0582483	0.0018287	0.114668	0.043025
Phospholipids in small HDL (mmol/l)	0.0674181	0.002621	0.132215	0.0414332		0.109466	0.0487242	0.170208	0.00041765		0.0208781	-0.0710475	0.112804	0.65603		0.0872237	0.0198322	0.154615	0.0112216		0.220715	0.182898	0.258533	6.204e-30		0.121351	0.071272	0.171429	2.087e-06
Total cholesterol in small HDL (mmol/l)	0.0048995	-0.060292	0.070091	0.882843		-0.0943348	-0.151483	-0.0371863	0.00122559		-0.0413817	-0.121505	0.0387419	0.311196		-0.0078539	-0.0713382	0.0556304	0.808301		0.302062	0.26525	0.338873	8.885e-57		-0.134261	-0.202062	-0.0664604	0.00010491
Cholesterol esters in small HDL (mmol/l)	0.0100601	-0.0539825	0.0741026	0.758074		-0.102334	-0.158519	-0.0461498	0.00036213		-0.0362725	-0.113299	0.040754	0.3558		-0.0101765	-0.074124	0.0537711	0.754974		0.283634	0.246551	0.320717	1.003e-49		-0.156756	-0.224531	-0.0889817	5.917e-06
Free cholesterol in small HDL (mmol/l)	-0.0171816	-0.0841003	0.0497372	0.61466		-0.0223785	-0.0822158	0.0374589	0.463387		-0.0465206	-0.136512	0.0434705	0.310753		0.0014572	-0.0650385	0.0679529	0.965719		0.153056	0.11903	0.187081	1.587e-18		0.0586172	0.0101433	0.107091	0.0177939
Triglycerides in small HDL (mmol/l)	0.0622077	-0.0093746	0.13379	0.0884809		0.113308	0.0439026	0.182714	0.00138671		0.0730101	-0.0097856	0.155806	0.08389		0.183292	0.113896	0.252687	2.492e-07		0.45329	0.419368	0.487211	1.17e-141		0.4209	0.367994	0.473807	1.479e-53
Mean diameter for VLDL particles (nm)	0.0702658	0.0095064	0.131025	0.023434		0.190835	0.120659	0.26101	1.066e-07		0.182152	0.110525	0.25378	6.765e-07		0.223445	0.144023	0.302868	3.988e-08		0.442963	0.41123	0.474695	1.58e-153		0.412208	0.362538	0.461877	5.295e-58
Mean diameter for LDL particles (nm)	-0.0404281	-0.0916138	0.0107576	0.121551		-0.0004944	-0.0753144	0.0743256	0.989662		-0.013407	-0.086214	0.0594001	0.718006		-0.112005	-0.184323	-0.0396862	0.00242146		-0.125554	-0.162468	-0.0886407	2.879e-11		0.0154168	-0.0472764	0.0781099	0.629763
Mean diameter for HDL particles (nm)	-0.173367	-0.234521	-0.112212	3.038e-08		-0.260356	-0.317195	-0.203518	5.555e-19		-0.169728	-0.244002	-0.0954537	7.914e-06		-0.246027	-0.306737	-0.185316	3.535e-15		-0.493776	-0.52253	-0.465023	1.24e-223		-0.426518	-0.470693	-0.382343	3.636e-77
Serum total cholesterol (mmol/l)	-0.0362623	-0.100472	0.0279472	0.268199		-0.0579734	-0.119862	0.0039147	0.066345		-0.003365	-0.0837489	0.0770189	0.93457		0.0390721	-0.0254632	0.103608	0.235193		0.110496	0.0734549	0.147538	5.296e-09		-0.0779019	-0.138124	-0.0176802	0.0112433
Total cholesterol in VLDL (mmol/l)	0.0824677	0.0117748	0.153161	0.0222509		0.167361	0.0941571	0.240566	7.726e-06		0.152091	0.0767741	0.227408	7.797e-05		0.223262	0.141271	0.305254	1.058e-07		0.451607	0.414685	0.488528	3.2e-120		0.354748	0.290262	0.419234	8.132e-27
Remnant cholesterol (non-HDL, non-LDL -cholesterol) (mmol/l)	0.0419365	-0.0280179	0.111891	0.239876		0.0899189	0.0210983	0.158739	0.0104662		0.100531	0.0210396	0.180022	0.0132183		0.161488	0.0857683	0.237208	3.031e-05		0.358776	0.321211	0.396341	1.33e-75		0.201352	0.140244	0.262459	1.151e-10
Total cholesterol in LDL (mmol/l)	-0.0153044	-0.0796469	0.0490381	0.640939		-0.0393585	-0.101091	0.0223738	0.211323		0.0064296	-0.0750124	0.0878716	0.876958		0.051707	-0.0154148	0.118829	0.130988		0.214446	0.173769	0.255122	8.761e-25		-0.0424969	-0.104643	0.0196488	0.18011
Total cholesterol in HDL (mmol/l)	-0.129604	-0.193843	-0.0653647	7.849e-05		-0.20958	-0.265054	-0.154105	1.812e-13		-0.139002	-0.216553	-0.0614517	0.00045082		-0.156793	-0.214428	-0.099158	1.086e-07		-0.388022	-0.416525	-0.359518	1.36e-146		-0.355477	-0.398019	-0.312935	9.373e-59
Total cholesterol in HDL2 (mmol/l)	-0.126479	-0.191727	-0.0612314	0.00014783		-0.218025	-0.275278	-0.160771	1.171e-13		-0.151548	-0.22789	-0.0752052	0.0001028		-0.177428	-0.239218	-0.115637	2.099e-08		-0.419548	-0.449212	-0.389883	2.87e-157		-0.381978	-0.426768	-0.337188	4.624e-61
Total cholesterol in HDL3 (mmol/l)	-0.128318	-0.190812	-0.065823	5.853e-05		-0.183845	-0.238656	-0.129033	5.963e-11		-0.109532	-0.188709	-0.0303555	0.00673026		-0.11186	-0.166005	-0.0577153	5.317e-05		-0.137781	-0.162531	-0.11303	2.06e-27		-0.139267	-0.164732	-0.113801	1.588e-26
Esterified cholesterol (mmol/l)	-0.0387479	-0.103869	0.0263732	0.243398		-0.0555158	-0.118029	0.0069971	0.0817283		0.0044789	-0.0768338	0.0857917	0.913976		0.0347038	-0.0313893	0.100797	0.303209		0.120992	0.0826844	0.1593	6.443e-10		-0.0830889	-0.14306	-0.0231176	0.00662795
Free cholesterol (mmol/l)	-0.0289182	-0.0923061	0.0344697	0.371073		-0.0609038	-0.122218	0.0004109	0.051554		-0.027962	-0.105969	0.0500452	0.482101		0.0509055	-0.0132917	0.115103	0.120063		0.080677	0.0431893	0.118165	2.499e-05		-0.0656026	-0.127259	-0.0039463	0.0370369
Serum total triglycerides (mmol/l)	0.0504571	-0.0143496	0.115264	0.126948		0.149282	0.0703187	0.228245	0.0002146		0.126011	0.0531473	0.198875	0.00071043		0.231547	0.13968	0.323414	8.47e-07		0.431515	0.395035	0.467995	5.97e-113		0.441643	0.374352	0.508934	2.777e-37
Triglycerides in VLDL (mmol/l)	0.0694793	0.0057275	0.133231	0.0326899		0.190708	0.111393	0.270023	2.566e-06		0.155216	0.0846968	0.225735	1.677e-05		0.255325	0.159441	0.351208	1.991e-07		0.434634	0.399176	0.470092	1.06e-120		0.466955	0.399098	0.534813	9.454e-41
Triglycerides in LDL (mmol/l)	-0.0501341	-0.117652	0.0173833	0.145495		-0.105053	-0.162587	-0.047518	0.00035017		-0.0488221	-0.126962	0.0293175	0.220557		0.0301085	-0.0248322	0.0850493	0.282577		0.25533	0.215355	0.295305	1.974e-35		0.103583	0.054857	0.152309	3.132e-05
Triglycerides in HDL (mmol/l)	0.0026703	-0.0668897	0.0722302	0.939998		0.0696789	0.0012971	0.138061	0.0458135		0.0683368	-0.0121201	0.148794	0.0959143		0.13351	0.0610982	0.205921	0.00030795		0.173028	0.133707	0.212349	8.425e-18		0.247417	0.187257	0.307577	9.311e-16
Diacylglycerol (mmol/l)	0.048104	-0.0413279	0.137536	0.29162		0.119565	0.052665	0.186464	0.00046628		0.113509	0.0281738	0.198844	0.00916555		0.196662	0.118856	0.274468	7.91e-07		0.281716	0.245299	0.318134	1.216e-50		0.242225	0.154665	0.329785	6.166e-08
Total phosphoglycerides (mmol/l)	-0.0815649	-0.148138	-0.014992	0.0163586		-0.0800112	-0.137139	-0.0228831	0.00607172		-0.060867	-0.14075	0.0190157	0.135233		0.0084032	-0.049012	0.0658183	0.774092		0.0379816	0.0008871	0.0750761	0.0447693		-0.0606304	-0.114788	-0.0064726	0.0282285
Phosphatidylcholine and other cholines (mmol/l)	-0.0791596	-0.146524	-0.0117955	0.021292		-0.109798	-0.167817	-0.0517802	0.00021144		-0.0754497	-0.153517	0.0026173	0.0581812		0.0020841	-0.0554663	0.0596346	0.943381		-0.0112476	-0.045664	0.0231687	0.521747		-0.0668635	-0.114901	-0.0188263	0.0063802
Total cholines (mmol/l)	-0.0760231	-0.140183	-0.0118628	0.0202365		-0.0990852	-0.155051	-0.0431196	0.00052671		-0.0565255	-0.134154	0.0211031	0.153419		-0.0046304	-0.0615919	0.0523311	0.873337		0.0050465	-0.0294527	0.0395456	0.774298		-0.077931	-0.128645	-0.0272168	0.00260399
Apolipoprotein A-I (g/l)	-0.111551	-0.173989	-0.0491138	0.00046819		-0.165033	-0.220552	-0.109515	6.389e-09		-0.0942095	-0.173167	-0.015252	0.0193889		-0.0809808	-0.134569	-0.0273925	0.00308089		-0.245981	-0.274918	-0.217044	1.088e-60		-0.267232	-0.313243	-0.22122	1.157e-29
Apolipoprotein B (g/l)	0.0355034	-0.0335801	0.104587	0.313651		0.0916346	0.0198035	0.163466	0.0124324		0.0996152	0.02183	0.1774	0.0121056		0.181225	0.10201	0.260439	7.728e-06		0.375347	0.336206	0.414488	3.499e-76		0.211615	0.148183	0.275046	6.768e-11
Total fatty acids (mmol/l)	-0.0231046	-0.089856	0.0436468	0.497351		0.0389145	-0.0315972	0.109426	0.279248		0.0368627	-0.0392224	0.112948	0.342099		0.124862	0.05099	0.198734	0.00093588		0.277187	0.237948	0.316426	8.714e-43		0.187563	0.123619	0.251508	9.459e-09
Estimated description of fatty acid chain length, not actual carbon number	0.0181124	-0.0431051	0.07933	0.561829		0.0603996	-0.0045346	0.125334	0.0682729		-0.0208506	-0.0923213	0.0506201	0.567249		0.0741458	-0.0063694	0.154661	0.0710622		0.118529	0.0851656	0.151893	3.739e-12		0.277489	0.216844	0.338134	4.177e-19
Estimated degree of unsaturation	0.0342525	-0.0293803	0.0978854	0.291267		-0.0012708	-0.0660081	0.0634665	0.969295		-0.0893296	-0.157153	-0.0215063	0.00987107		-0.0649595	-0.142908	0.0129888	0.102328		-0.228882	-0.264552	-0.193212	1.01e-35		-0.344328	-0.415079	-0.273576	2.197e-21
22:6, docosahexaenoic acid (mmol/l)	-0.024191	-0.0900798	0.0416978	0.471604		0.0308082	-0.0274665	0.0890828	0.299967		-0.0158446	-0.0945188	0.0628297	0.692877		0.0406247	-0.0091815	0.0904309	0.109825		0.0224083	-0.0156017	0.0604183	0.247834		-0.0093362	-0.0601221	0.0414496	0.718562
18:2, linoleic acid (mmol/l)	-0.073469	-0.136945	-0.0099928	0.0233185		-0.0821971	-0.144891	-0.0195037	0.0102025		-0.0345395	-0.112607	0.0435278	0.385628		0.0420267	-0.029372	0.113425	0.248448		0.0803946	0.0418213	0.118968	4.461e-05		-0.0798724	-0.138769	-0.0209761	0.00787082
Conjugated linoleic acid (mmol/l)	-0.0015097	-0.0551672	0.0521478	0.956004		0.0093117	-0.0506962	0.0693195	0.760925		0.0503934	-0.0077527	0.108539	0.0893394		0.0959763	0.0221359	0.169817	0.010882		0.149367	0.108003	0.190732	1.666e-12		0.100961	0.0462018	0.15572	0.00030401
Omega-3 fatty acids (mmol/l)	-0.0316491	-0.0928353	0.0295371	0.310518		0.0536858	-0.0104555	0.117827	0.100862		-0.0170608	-0.0913138	0.0571921	0.652284		0.0398039	-0.0313299	0.110938	0.272563		0.103477	0.0653361	0.141617	1.093e-07		0.0037225	-0.0505051	0.0579502	0.892951
Omega-6 fatty acids (mmol/l)	-0.0443344	-0.108668	0.0199987	0.176696		-0.0487332	-0.111848	0.0143815	0.13012		-0.011751	-0.0903003	0.0667984	0.769229		0.0580814	-0.0104219	0.126585	0.0965002		0.127918	0.0898278	0.166008	5.081e-11		-0.0267933	-0.0850067	0.0314201	0.366931
Polyunsaturated fatty acids (mmol/l)	-0.0481754	-0.111984	0.0156327	0.138857		-0.0382229	-0.101803	0.0253572	0.238551		-0.0129606	-0.0908271	0.0649059	0.744106		0.0579109	-0.0108493	0.126671	0.0987385		0.130588	0.0926575	0.168518	1.661e-11		-0.0233347	-0.0811001	0.0344308	0.428435
Monounsaturated fatty acids; 16:1, 18:1 (mmol/l)	0.0335894	-0.0321602	0.0993391	0.316532		0.0970734	0.0198759	0.174271	0.013741		0.0565717	-0.0175792	0.130723	0.134736		0.183771	0.101577	0.265965	1.233e-05		0.360745	0.321854	0.399635	1.736e-71		0.325728	0.259021	0.392434	1.624e-21
Saturated fatty acids (mmol/l)	-0.0454553	-0.115455	0.0245449	0.203002		0.0300281	-0.0390945	0.0991507	0.394355		0.0541549	-0.023954	0.132264	0.174045		0.102952	0.0286999	0.177204	0.00660718		0.2708	0.23188	0.309721	1.389e-41		0.209749	0.144259	0.275238	3.714e-10
Glucose (mmol/l)	-0.0149456	-0.0638571	0.0339658	0.549082		0.0145486	-0.0509301	0.0800273	0.663081		0.0381044	-0.0059205	0.0821294	0.0897645		0.0666003	0.0095948	0.123606	0.0220589		0.218652	0.169578	0.267727	3.305e-18		0.227187	0.158118	0.296256	1.239e-10
Lactate (mmol/l)	0.0079708	-0.0514583	0.0673999	0.792559		0.0335183	-0.0327005	0.099737	0.320998		-0.0275786	-0.0964905	0.0413334	0.432586		0.0451423	-0.03358	0.123865	0.260856		0.151025	0.11156	0.190489	7.405e-14		0.170868	0.102296	0.23944	1.067e-06
Citrate (mmol/l)	-0.136313	-0.194246	-0.0783789	4.176e-06		-0.227199	-0.286811	-0.167588	1.119e-13		-0.160461	-0.229462	-0.0914593	5.472e-06		-0.19063	-0.266445	-0.114815	8.994e-07		-0.109122	-0.139763	-0.0784806	3.308e-12		-0.0723873	-0.121319	-0.0234556	0.00374589
Alanine (mmol/l)	-0.0224914	-0.0830033	0.0380205	0.466144		0.0666046	0.0069249	0.126284	0.0287314		0.0151398	-0.0627167	0.0929963	0.702942		0.0540752	-0.021629	0.129779	0.161391		0.230488	0.199581	0.261395	2.079e-47		0.138341	0.0916248	0.185058	6.825e-09
Glutamine (mmol/l)	-0.117846	-0.178336	-0.0573569	0.00013687		0.0089587	-0.0477975	0.0657149	0.756939		-0.0453899	-0.114522	0.0237424	0.197995		-0.036157	-0.106697	0.0343831	0.314862		-0.116386	-0.154734	-0.0780372	2.871e-09		-0.216607	-0.274004	-0.159211	1.613e-13
Histidine (mmol/l)	0.0025187	-0.0612239	0.0662613	0.938241		0.0252083	-0.0399201	0.0903367	0.447903		0.0037326	-0.0732404	0.0807057	0.924235		0.0076802	-0.0605513	0.0759117	0.825289		-0.0326819	-0.0749587	0.009595	0.129707		-0.063724	-0.107094	-0.0203536	0.00398792
Isoleucine (mmol/l)	0.0522738	-0.0117713	0.116319	0.109607		0.139792	0.073504	0.206081	3.675e-05		0.0829641	0.0178739	0.148054	0.0125165		0.171113	0.0841645	0.258062	0.00011787		0.368682	0.338035	0.39933	1.51e-116		0.431135	0.375701	0.486569	2.571e-51
Leucine (mmol/l)	0.0377108	-0.0198264	0.0952481	0.198822		0.124612	0.061076	0.188148	0.00012341		0.03708	-0.0243857	0.0985457	0.236877		0.119174	0.043242	0.195106	0.00211614		0.205099	0.180059	0.23014	1.401e-56		0.442802	0.384868	0.500736	1.17e-49
Valine (mmol/l)	0.0901242	0.0248655	0.155383	0.0068162		0.147539	0.0837687	0.211309	6.013e-06		0.0926954	0.0235915	0.161799	0.00859349		0.122579	0.0429443	0.202213	0.00257463		0.405443	0.368403	0.442483	1.079e-97		0.329761	0.278516	0.381007	6.286e-36
Phenylalanine (mmol/l)	0.0839043	0.0240391	0.143769	0.00603576		0.116475	0.049787	0.183164	0.00062594		0.0801569	0.0073147	0.152999	0.0310442		0.122197	0.0344138	0.209981	0.00639534		0.185952	0.157603	0.214301	3.055e-37		0.226533	0.1829	0.270165	4.305e-24
Tyrosine (mmol/l)	0.0295576	-0.0374363	0.0965515	0.387016		0.121073	0.0581591	0.183986	0.00016502		0.137481	0.0591431	0.21582	0.00059171		0.118109	0.055605	0.180612	0.00021739		0.306859	0.26927	0.344448	3.16e-56		0.355353	0.300833	0.409874	8.443e-37
Acetate (mmol/l)	-0.0108784	-0.0701275	0.0483707	0.718839		-0.128798	-0.19343	-0.0641659	9.591e-05		-0.0315653	-0.108619	0.0454879	0.421793		-0.0248313	-0.0582374	0.0085748	0.145042		-0.0349353	-0.0669605	-0.0029102	0.0325175		-0.0726215	-0.138537	-0.0067056	0.0308299
Acetoacetate (mmol/l)	0.0486831	-0.0064881	0.103854	0.0836945		0.0020288	-0.0476832	0.0517408	0.936219		-0.112339	-0.166515	-0.0581641	4.988e-05		0.0261723	-0.0536839	0.106028	0.520412
3-hydroxybutyrate (mmol/l)	0.0215334	-0.0492951	0.0923619	0.551102		-0.0153219	-0.0580417	0.027398	0.481913		-0.128069	-0.192471	-0.0636675	9.997e-05		-0.0117901	-0.0748762	0.0512961	0.713986		-0.115944	-0.149619	-0.0822678	1.654e-11		-0.0177824	-0.065327	0.0297622	0.463448
Creatinine (mmol/l)	0.0518032	-0.0004294	0.104036	0.0519118		0.180259	0.113972	0.246546	1.067e-07		0.0357371	-0.0215659	0.0930402	0.221411		0.0895954	0.024629	0.154562	0.00690214		0.180344	0.139038	0.221651	1.502e-17		0.0231342	-0.0367003	0.0829687	0.448499
Albumin (signal area)	-0.0462841	-0.109604	0.0170355	0.151872		0.145445	0.0825279	0.208362	6.12e-06		-0.117197	-0.188608	-0.0457867	0.00131186		0.0017979	-0.0714985	0.0750943	0.961632		-0.121198	-0.157014	-0.085381	3.625e-11		-0.0681973	-0.120993	-0.0154017	0.0113609
Glycoprotein acetyls, mainly a1-acid glycoprotein (mmol/l)	0.188642	0.124033	0.253252	1.171e-08		0.223532	0.163399	0.283666	4.321e-13		0.206699	0.139058	0.27434	2.53e-09		0.222646	0.156895	0.288397	4.234e-11		0.551989	0.520631	0.583348	1.05e-233		0.525392	0.454424	0.59636	9.235e-47
